# Supplementary material
Source: PubMed Central journal article supplement (PMC6263840)
Supplement: NIHMS992835-supplement-Supp_info.pdf [file NIHMS992835-supplement-Supp_info.pdf]

**Supplementary Information for  
Designing seryl-tRNA synthetase for improved serylation of selenocysteine tRNAs**

Xian Fu, Ana Crnković, Anastasia Sevostyanova and Dieter Söll

This file includes:

Supplementary Text

Figure S1: Nonsense suppression efficiency of tRNA<sup>UTuX</sup> and tRNA<sup>SecUX</sup>.

Figure S2: Nonsense suppression efficiency using a serine-specific reporter, CAT-S146TAG.

Figure S3: Serylation of tRNA<sup>UTuX</sup> by SerRS variants with a flexible linker and S55A mutation as monitored by a nonsense suppression assay.

Figure S4: Reexamination of selected SerRS variants in a tRNA<sup>UTuX</sup>-dependent nonsense suppression assay.

Figure S5: Serine 55-to-alanine mutation is essential for SerRS V20 activity *in vivo*.

Figure S6: Stop-codon read-through using evolved variants and tRNA<sup>Ser</sup> derived suppressor, SupD.

Table S1: Oligonucleotides used in this study.

Supplementary References

### Initial design and trials in SerRS evolution

We initially tested two assumptions: (i) that increasing the distance between N- and C-terminal domains of SerRS may help accommodate long acceptor-T $\psi$ C arm of tRNA<sup>Sec</sup> and its variants and (ii) that the mutagenesis of an N-domain serine residue (S55), implicated in tRNA<sup>Sec</sup> vs. tRNA<sup>Ser</sup> discrimination [1], could help improve tRNA<sup>Sec</sup> recognition. Because tRNA<sup>UTuX</sup> allowed a wider range of Cm levels at which we could assess suitability of particular SerRS mutations (Figure S1, S2), and was seemingly a better substrate for wild-type SerRS, we decided to test our SerRS variants using this particular tRNA<sup>Sec</sup> derivative.

To create a SerRS variant with increased flexibility between its N- and C-domains, a sequence coding for a GGGGS linker was inserted before glycine 114. Because canonical tRNA<sup>Sec</sup> has a long, atypical, 13-base pair acceptor-T $\psi$ C arm, this feature was speculated to be the main reason for the lack of efficient charging by *E. coli* SerRS [2,3]. However, *in vivo* suppression assay using CAT-112TAG reporter revealed that DH10B  $\Delta$ *selAB*::*zeo* cells expressing the linker-containing variant were slightly more sensitive to Cm than cells expressing wt SerRS (Figure S3). This suggests that the linker-containing SerRS variant serylates tRNA<sup>UTuX</sup> less proficiently than wt SerRS.

When SerRS-S55A variant was assayed using CAT-112TAG reporter both wt SerRS and SerRS-S55A variant facilitated cell growth at similar Cm concentrations ( $\leq 75$   $\mu$ g/ml, Fig. S3), revealing that S55A mutation has little if any influence on EcSerRS and tRNA<sup>UTuX</sup> interaction.

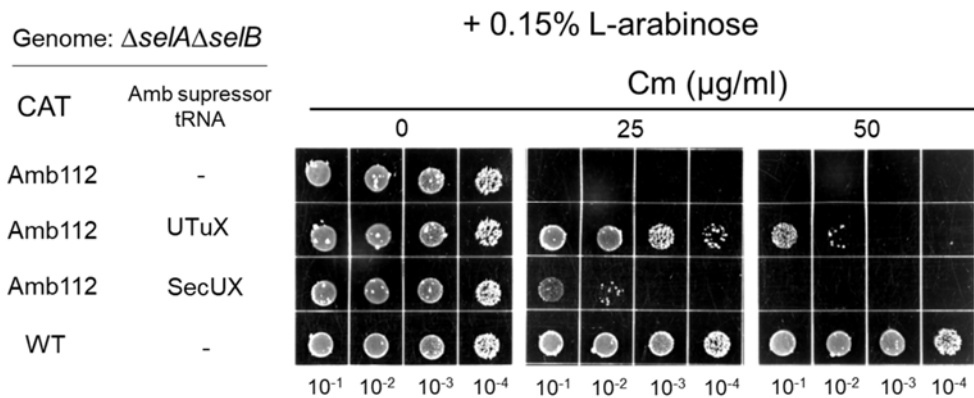

Figure S1. Nonsense suppression efficiency of  $tRNA^{UTuX}$  and  $tRNA^{SecUX}$ . *E. coli* strain DH10B  $\Delta selAB::zeo$  expressing chloramphenicol (Cm) acetyltransferase (CAT) with an amber codon at position 112 and  $tRNA^{UTuX}$  or  $tRNA^{SecUX}$  was grown on LB with different concentration of Cm (0, 25, 50  $\mu\text{g/ml}$ ). Cells not expressing any suppressor tRNAs were used to monitor levels of near-cognate suppression. Cells expressing wild-type (wt) CAT were used to determine maximum expression. Wild-type SerRS was induced with 0.15% L-arabinose.

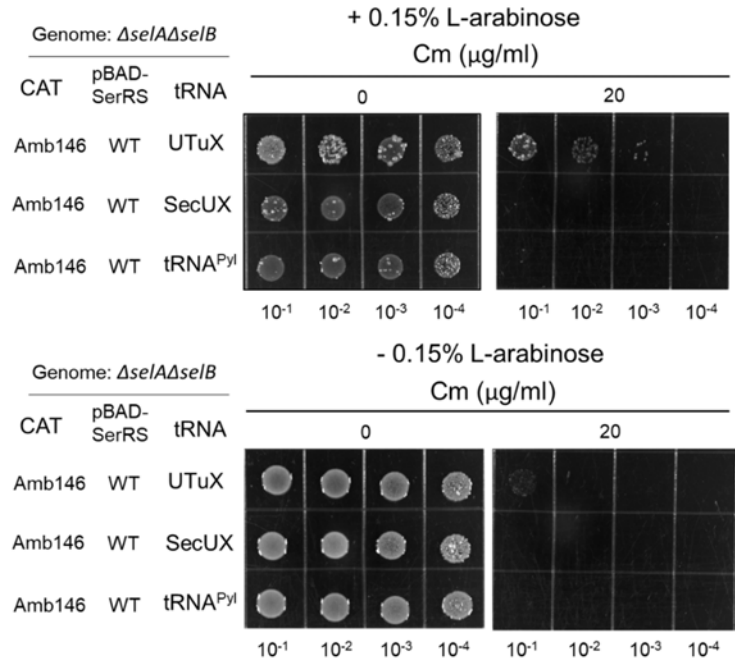

Figure S2. Nonsense suppression efficiency using a serine-specific reporter, CAT-S146TAG. DH10B  $\Delta seI\Delta seI B::zeo$  cells expressing different amber suppressors (tRNA<sup>UTuX</sup>, tRNA<sup>SecUX</sup> or tRNA<sup>Pyl</sup>) and CAT-S146TAG were grown on LB plates supplemented with various concentration of Cm (0 and 20  $\mu\text{g/ml}$ ). tRNA under the control of an *lpp* promoter and the *cat* gene with an amber codon at position 146 were in the same plasmid. SerRS-coding sequence was placed under the P<sub>BAD</sub> promoter on the second, high-copy plasmid. SerRS expression was induced by 0.15% L-arabinose. Suppressors which are not recognized by *E. coli* SerRS cannot facilitate growth, as demonstrated by attempted use of tRNA<sup>Pyl</sup>.

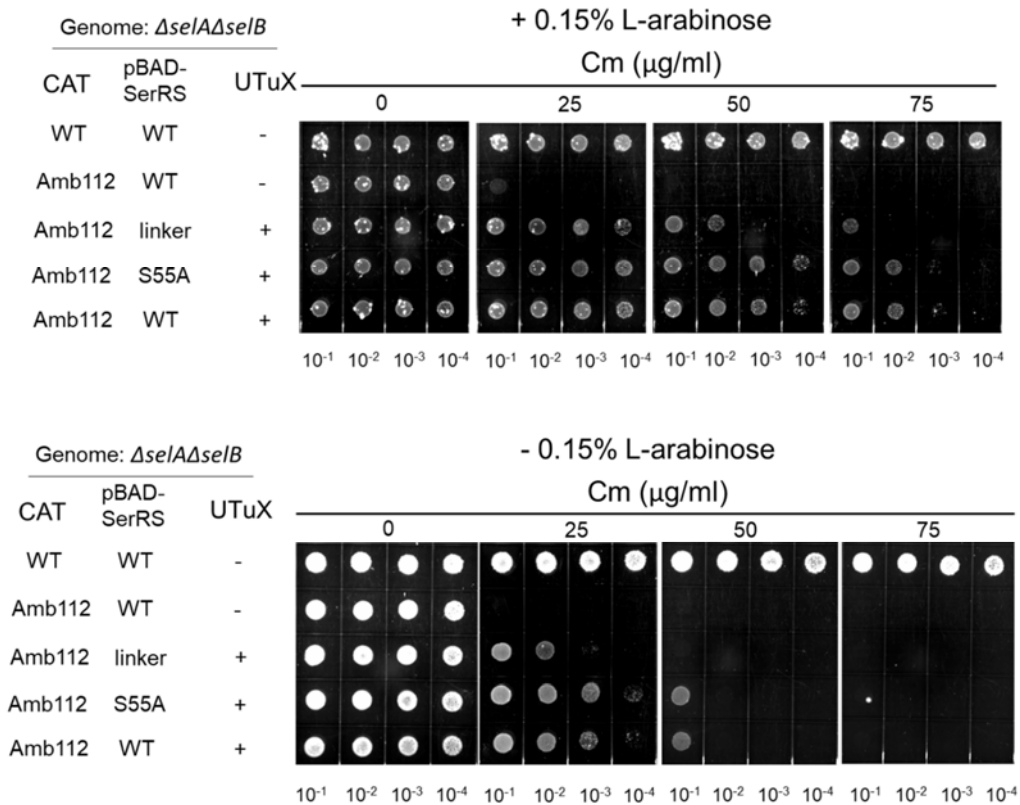

Figure S3. Serylation of tRNA<sup>UTuX</sup> by SerRS variants with a flexible linker and S55A mutation as monitored by a nonsense suppression assay. *E. coli* cells DH10B  $\Delta selA\Delta selB::zeo$  expressing tRNA<sup>UTuX</sup> and SerRS (wt and mutant enzymes as indicated) were grown on LB plates supplemented with different concentrations of Cm (0, 25, 50, 75  $\mu\text{g/ml}$ ). tRNA<sup>UTuX</sup> was under the control of an *lpp* promoter and SerRS was placed under the P<sub>BAD</sub> promoter; these two genes were on the same high-copy plasmid. The CAT gene with an amber codon at position 112 was on the second plasmid. SerRS expression was induced with 0.15% L-arabinose. Cells not expressing any suppressor tRNAs were used to monitor levels of near-cognate suppression. Cells expressing wild-type (wt) CAT were used to determine maximum expression.

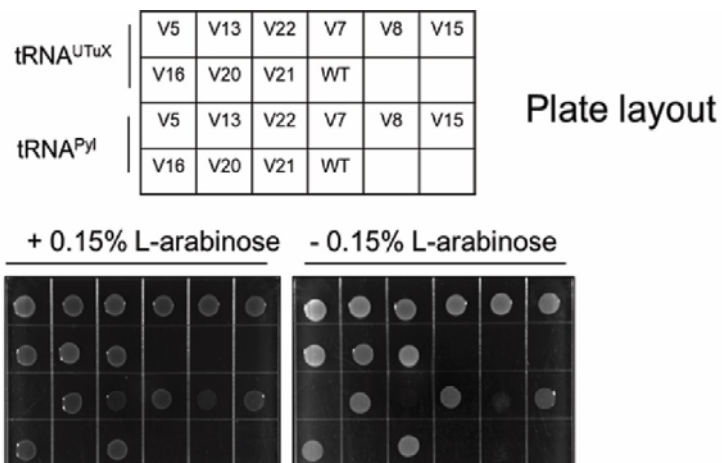

Figure S4. Reexamination of selected SerRS variants in a tRNA<sup>UTuX</sup>-dependent nonsense suppression assay. Using a serine-specific CAT-S146TAG reporter in combination with either tRNA<sup>UTuX</sup> or tRNA<sup>Pyl</sup>, a total of 22 selected SerRS clones were assayed in the DH10B  $\Delta se/AB::zeo$  strain. Cell survival was examined at 65  $\mu\text{g/ml}$  Cm. Four clones (SerRS V5, V8, V20, and V22) were found to allow much higher Cm resistance than the wt SerRS; later experiments showed that the activity of variant V5 is not stable. The activity of other SerRS clones was not dependent on tRNA<sup>UTuX</sup> expression and those clones were removed from the study. Although SerRS-encoding sequences were placed under the P<sub>BAD</sub> promoter, no difference in growth was observed when arabinose was omitted from the screen. This arabinose-independent expression occurred due to an in-frame deletion of the AraC N-terminus. The N-terminal arm of AraC is involved in the light switch mechanism where a significant structural change occurs upon arabinose binding [4]. Because AraC mutations allow constitutive expression from P<sub>BAD</sub> promoter [5] the four SerRS clones were expressed even when arabinose was absent from the media, thereby allowing CAT biosynthesis and subsequently Cm resistance.

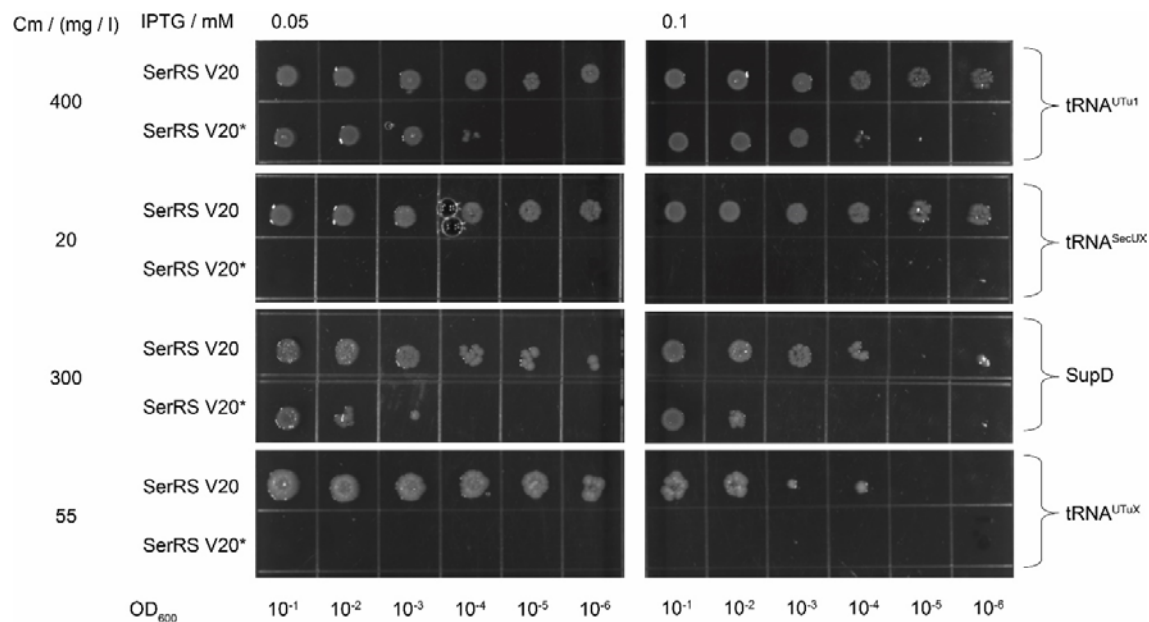

Figure S5. Serine 55-to-alanine mutation is essential for SerRS V20 activity *in vivo*. *E. coli* strain WL30153 (MC4100  $\Delta selAB$ , [6]) expressing a suppressor tRNA (tRNA<sup>UTu1</sup>, tRNA<sup>SecUX</sup>, SupD or tRNA<sup>UTuX</sup>) and SerRS V20 or SerRS V20-A55S (denoted as SerRS V20\*) was grown on LB plates supplemented with different concentrations of Cm (400, 20, 300, 55 mg/l). The *cat* gene with an amber codon at position 146 and the tRNA gene under the control of an *lpp* promoter were on the same plasmid. SerRS V20 or V20-A55S were placed under the *trc* promoter on a separate plasmid. SerRS expression was induced with 0.05 or 0.1 mM IPTG.

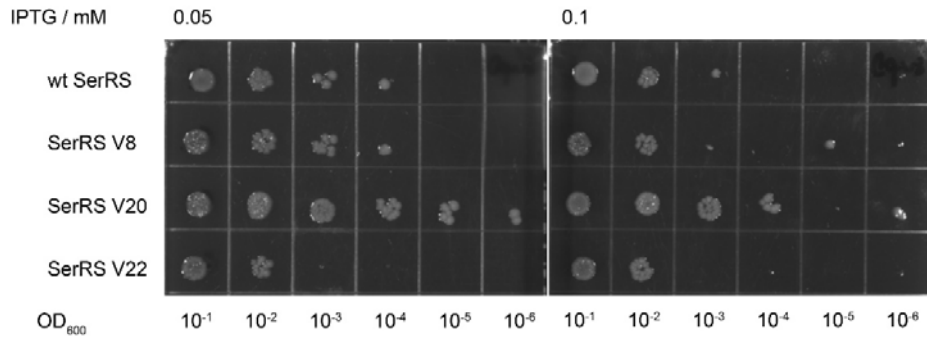

Figure S6. Stop-codon read-through using evolved variants and tRNA<sup>Ser</sup> derived suppressor, SupD. *E. coli* strain WL30153 [6] in which tRNA SupD and SerRS variants were expressed was grown on LB plates supplemented with 300 mg/l of Cm. The *cat* gene with an amber codon at position 146 and the tRNA gene under the control of an *lpp* promoter were on the same plasmid. SerRS variants were placed under the *trc* promoter on a separate plasmid. SerRS expression was induced with 0.05 or 0.1 mM IPTG.



Table S1. Oligonucleotides used in this study.

| Primer name | Sequence                                 | Application                                                             |
|-------------|------------------------------------------|-------------------------------------------------------------------------|
| pACYC.UTu1F | gttcccctccgaattcagcgttacaagtattacac      | pACYC184                                                                |
| pACYC.UTu1R | ccgccaggatcctctagagtcgacctg              | backbone<br>amplification for<br>tRNA <sup>UTu1</sup> gene<br>insertion |
| UTu1.F      | cgctgaattcggaggggaactctatctgg            | tRNA <sup>UTu1</sup> gene                                               |
| UTu1.R      | tctagaggatcctggcggaggggaagggaaac         | amplification                                                           |
| pACYC.selCF | cgatctccgaattcagcgttacaagtattacac        | pACYC184                                                                |
| pACYC.selCR | ttccgccaggatcctctagagtcgacctg            | backbone<br>amplification for<br>selC(amb)<br>insertion                 |
| SelC.F      | gctgaattcggagagatcgtcgtctccgg            | selC(amb)                                                               |
| SelC.R      | ctagaggatcctggcggagatcacaggag            | amplification                                                           |
| pACYC.supDF | atctctccgaattcagcgttacaagtattacaaaag     | pACYC184                                                                |
| pACYC.supDR | ctccgccaggatcctctagagtcgacctgcagatccttag | backbone<br>amplification for<br>supD insertion                         |
| supD.F      | acgctgaattcggagagatgccggagcg             | supD                                                                    |
| supD.R      | ctagaggatcctggcggagagaggggg              | amplification                                                           |
| A55S.F      | agcgtaactccgatcgaatccattggccaggcgaaagc   | SerRS V20                                                               |
| A55S.R      | caatggatttcgatcgggagttacgctccgcttg       | mutagenesis                                                             |
| EcSer.Fi    | cagcagattgggatcgagcat                    | pET15                                                                   |
| EcSer.Ri    | gaacggactggaatatattggc                   | backbone<br>amplification                                               |
| EcSer.F     | atgctcgatcccaatctgctg                    | serS gene                                                               |
| EcSer.R     | gccaatatattccagtccgttc                   | amplification to<br>generate<br>pET15-serS                              |
| p18UTu1.F   | gttcccctctatagtgagtcgtattagatccccg       | pUC18                                                                   |
| p18UTu1.R   | ctccgccaggcataagcttggcgtaac              | backbone<br>amplification for<br>pUC18-<br>tRNA(UTu1)                   |
| 18UTu1.F    | cactataggaggggaactctatctgg               | tRNA(UTu1)                                                              |
| 18UTu1.R    | tgctggcggaggggaagg                       | amplification for<br>pUC18-<br>tRNA(UTu1)                               |
| p18supD.F   | ctccggcatctctctatagtgagtcgtattagatccccg  | pUC18                                                                   |
| p18supD.R   | ctctctccgccaggcataagcttggcgtaac          | backbone                                                                |

|             |                                             |                                                |
|-------------|---------------------------------------------|------------------------------------------------|
|             |                                             | amplification for pUC18-supD                   |
| 18supD.F    | ctataggagagatgccggagcggc                    | supD                                           |
| 18supD.R    | cttatgcctggcggagagaggg                      | amplification for pUC18-supD                   |
| p18UTuX.F   | gcacatcttctatagtgagtcgattaggatccccg         | pUC18                                          |
| p18UTuX.R   | gcattctccgccaggcataagcttggcgtaatc           | backbone amplification for pUC18-tRNA(UTuX)    |
| 18UTuX.F    | cactataggaagatggtgccgtcc                    | tRNA(UtuX)                                     |
| 18UTuX.R    | tatgcctggcgggaagatgcagg                     | amplification for pUC18-tRNA(UTuX)             |
| p18SecUX.F  | cgacatcttctatagtgagtcgattaggatccccg         | pUC18                                          |
| p18SecUX.R  | cttgcattctccgccaggcataagcttggcgtaatc        | backbone amplification for pUC18-tRNA(SecUX)   |
| 18SecUX.F   | ctcactataggaagatggtcgtctccg                 | tRNA(SecUX)                                    |
| 18SecUX.R   | gcctggcgggaagatgcaaggag                     | amplification for pUC18-tRNA(SecUX)            |
| tRNA_184_FW | caacatgaatggtcttcgggaaagcaaattcgacccgggocg  | <i>lpp</i> -tRNA- <i>rrnC</i>                  |
| tRNA_184_RV | gtttaccggtttattgactacgatcgtgctcctgctgtg     | cassette amplification for pXF113/114/115      |
| inV184_FW   | gtagtcaataaaccggtaaaccag                    | pACYC184                                       |
| inV184_RV   | ccgaagaccattcatgtttgtg                      | backbone amplification for pXF113/114/115      |
| Linker FW   | ggtggtggtggcagcggtaaagacgaaaatgacaac        | add GGGGS                                      |
| Linker RV   | gctgccaccaccctaccggcacttcatctgcag           | linker before G114 of SerRS                    |
| S55A FW     | gcggagcgtactcccgagcgaatccattggccaggcg       | mutate Ser55 of SerRS to Ala                   |
| S55A RV     | cgctggccaatggattcgcctgggagttacgctccgc       |                                                |
| tRNA_426_FW | tccccgaaaagtgccaccgccaccctggcggcgtcttctt    | <i>lpp</i> -tRNA- <i>rrnC</i>                  |
| tRNA_426_RV | catttgacaggcacattatgttgaggaccggctaggctagatc | cassette amplification for pBAD-SerRS plasmids |
| inV426_FW   | cataatgtgcctgtcaaattggacgaagc               | pACYC184                                       |
| inV426_RV   | gcggtggcacttttcggggaaa                      | backbone amplification                         |

|             |                                                                                  |                                                                                                                |
|-------------|----------------------------------------------------------------------------------|----------------------------------------------------------------------------------------------------------------|
| pTRC_R      | catggtctgttctctgtg                                                               | pTrc99A backbone amplification                                                                                 |
| pTRC_F      | tgtttggcggatgagagaag                                                             |                                                                                                                |
| Ser_pTRC_F  | caggaaacagaccatgctcgatccaatctgctgc                                               | serS gene amplification for pTrc99A                                                                            |
| Ser_pTRC_R  | ctcatccgcaaaacattagccaatatattccagtcgctc                                          |                                                                                                                |
| Frag1 FW    | gtgtctataatcacggcagaaaagtccac                                                    | To generate SerRS inserts fully randomized at given positions (residues K86, A87, D90, S160 and D228 and T229) |
| Frag1 RV    | cgatatcggaattcagcctgtaagcmnncagctcmnmnmntgctgcatccagctcttcgcc                    |                                                                                                                |
| Frag2 FW    | gctttacaggctgaaattcgcatatcg                                                      |                                                                                                                |
| Frag2-1 RV  | caatctgccctttcattaccacaagcgAHNaccagtcagcttaactgcagctgc                           |                                                                                                                |
| Frag2-2 RV  | caatctgccctttcattaccacaagcgCDBaccagtcagcttaactgcagctgc                           |                                                                                                                |
| Frag2-3 RV  | caatctgccctttcattaccacaagcgCCAaccagtcagcttaactgcagctgc                           |                                                                                                                |
| Frag3 FW    | cgctttgtgtaataaaggccagattg                                                       |                                                                                                                |
| Frag3-1 RV  | ccgttgggatcagcgcgatagttactAHNAHNTgcttcttctccagcggacgag                           |                                                                                                                |
| Frag3-2 RV  | ccgttgggatcagcgcgatagttactCDBCDBtcttcttctccagcggacgag                            |                                                                                                                |
| Frag3-3 RV  | ccgttgggatcagcgcgatagttactCCACCAAtgcttcttctccagcggacgag                          |                                                                                                                |
| Frag3-4 RV  | ccgttgggatcagcgcgatagttactCDBAHNTgcttcttctccagcggacgag                           |                                                                                                                |
| Frag3-5 RV  | ccgttgggatcagcgcgatagttactCCAAHNTgcttcttctccagcggacgag                           |                                                                                                                |
| Frag3-6 RV  | ccgttgggatcagcgcgatagttactCCACDBtcttcttctccagcggacgag                            |                                                                                                                |
| Frag3-7 RV  | ccgttgggatcagcgcgatagttactAHNCDBtcttcttctccagcggacgag                            |                                                                                                                |
| Frag3-8 RV  | ccgttgggatcagcgcgatagttactAHNCCAAtgcttcttctccagcggacgag                          |                                                                                                                |
| Frag3-9 RV  | ccgttgggatcagcgcgatagttactCDBCCAAtgcttcttctccagcggacgag                          |                                                                                                                |
| Frag4 FW    | agtaactatgcgctgatccaacgg                                                         |                                                                                                                |
| Frag4 RV    | ctgtgccgggatccatacttc                                                            |                                                                                                                |
| EM7-zeo FW  | ggcttgatgcgcatatgtcctcctgacccatctcacgttacaatccgtgaggatctgatcagcacgtgtgac         | EM7-zeocin cassette amplification for DH10B $\Delta$ seIAB::zeo strain                                         |
| EM7-zeo RV  | ccttattttccggaataataatgctgctgcgcaataaatgatcatttctcctcagtcctgctcctcggcc           |                                                                                                                |
| EcSerSf     | cagaccatggaaatgctcgatccaatctgctgc                                                | amplification of the serS gene to generate pBAD-serS plasmids                                                  |
| EcSerSr     | agccggtaccttagccaatatattccagtcgctcatatacg                                        |                                                                                                                |
| supF 113 FW | ctctaaaactgcgctcatcgactcgaaggtcgaatcctccccaccaccaggatcctctagagtcgacctg           | Replace tRNA <sup>UTuX</sup> in pXF113 by supF                                                                 |
| supF 113 RV | ctttgtgtaataactgtaacgctgaattcgggtggggtccccagcggccaaaggagcagactctaaaatctgcccgtcat |                                                                                                                |

Table 2. Steady-state kinetic parameters for SupD in case of wild-type SerRS and SerRS variants V8 and V20. All reactions were performed at 37 °C. Concentration of SupD was corrected for plateau charging (29.7 %). In aminoacylation with SupD enzyme concentrations were: 30 nM wild-type SerRS, 15 nM SerRS V8, 15 nM SerRS V20.

| enzyme | $K_M$ ( $\mu\text{M}$ ) | $k_{\text{cat}}$ ( $\text{min}^{-1}$ ) | $k_{\text{cat}} / K_M$ ( $\text{min}^{-1} \mu\text{M}^{-1}$ ) | relative loss |
|--------|-------------------------|----------------------------------------|---------------------------------------------------------------|---------------|
| wt     | 0.76                    | 95                                     | 130                                                           | 1             |
| V8     | 1.6                     | 47                                     | 29                                                            | 4.3           |
| V20    | 1.3                     | 31                                     | 23                                                            | 5.5           |

### Supplementary references:

- [1] Wang, C., Guo, Y., Tian, Q., Jia, Q., Gao, Y., Zhang, Q., Zhou, C. and Xie, W. (2015). SerRS-tRNA<sup>Sec</sup> complex structures reveal mechanism of the first step in selenocysteine biosynthesis. *Nucleic Acids Res* 43, 10534-45.
- [2] Baron, C. and Böck, A. (1991). The length of the aminoacyl-acceptor stem of the selenocysteine-specific tRNA<sup>Sec</sup> of *Escherichia coli* is the determinant for binding to elongation factors SELB or Tu. *J Biol Chem* 266, 20375-9.
- [3] Holman, K.M., Puppala, A.K., Lee, J.W., Lee, H. and Simonović, M. (2017). Insights into substrate promiscuity of human seryl-tRNA synthetase. *RNA* 23, 1685-1699.
- [4] Schleif, R. (2010). AraC protein, regulation of the *L*-arabinose operon in *Escherichia coli*, and the light switch mechanism of AraC action. *FEMS Microbiol Rev* 34, 779-96.
- [5] Ross, J.J., Gryczynski, U. and Schleif, R. (2003). Mutational analysis of residue roles in AraC function. *J Mol Biol* 328, 85-93.
- [6] Leinfelder, W., Forchhammer, K., Zinoni, F., Sawers, G., Mandrand-Berthelot, M.A. and Böck, A. (1988). *Escherichia coli* genes whose products are involved in selenium metabolism. *J Bacteriol* 170, 540-6.
